# Supplementary material for: New porphyrin dyes containing a hydrazide anchor for dye-sensitized solar cells
Source: Royal Society of Chemistry journal article supplement (doi:10.1039/c8nj02889c), 2018-01-01
Supplement: c8nj02889c1.pdf [file c8nj02889c1.pdf]

*Supporting information*

**New porphyrin dyes containing hydrazide anchor for dye-sensitized solar cells**

Hai-Lang Jia,<sup>\*ab</sup> Zhi-Ji Peng<sup>a</sup> and Ming-Yun Guan<sup>a</sup>

<sup>a</sup>School of Chemical and Environmental Engineering, Jiangsu University of Technology, Changzhou 213001, P. R. China

<sup>b</sup>State Key Laboratory of Coordination Chemistry, Nanjing University, Nanjing 210093, P. R. China

## General information

All solvents were treated by standard methods before use and all chemicals were purchased from commercial suppliers and used without further purification unless indicated otherwise. *N, N*-Dimethylformamide (DMF) and tetrahydrofuran (THF) were dried and distilled from CaH<sub>2</sub>.

The <sup>1</sup>H NMR and <sup>13</sup>C NMR spectra were recorded on a Bruker DRX (300, 400 MHz) NMR spectrometer with tetramethylsilane (TMS) as the internal standard. The mass spectra were measured in ESI Mass Spectrometer (LCQ Fleet).

## Experimental

### Fabrication of DSSCs

The working electrode (active area is 0.196 cm<sup>2</sup>) was prepared by screen printing the TiO<sub>2</sub> paste on Fluorine-doped tin oxide (FTO) glass plates (15 Ω / square). For preparation of a DSSC, FTO glass plates were cleaned in a detergent solution using an ultrasonic bath for 30 min for two times and then rinsed with water and ethanol. Then, the plates were immersed into 40 mM TiCl<sub>4</sub> (aqueous) at 70°C for 30 min and washed with water and ethanol. The TiO<sub>2</sub> paste consisted of 12 μm thick film (particle size, 20 nm, pore size 32 nm). The TiO<sub>2</sub> films were performed with a programmed procedure: (1) 80°C for 15 min; (2) 135°C for 10 min; (3) 325°C for 30 min; (4) 375°C for 5 min; (5) 450°C for 15 min, and (6) 500°C for 15 min. Then the films were treated again with TiCl<sub>4</sub> at 70°C for 30 min and sintered at 500°C for 30 min. Then the electrode was immersed into 0.2 mM dye (JA4 and JA5) solution (THF/EtOH=1/4) for 18 h at room temperature. The working electrode and the Pt counter electrode were then sealed with a Surlyn film (25 μm) by heating the sandwich-type cell at 110°C. The electrolyte was introduced through pre-drilled holes in the counter electrode and was driven into the cell via vacuum backfilling, and the hole was sealed with a Surlyn film and a thin glass (0.1 mm thickness) cover by heating. The

electrolyte was composed of 0.6 M 1-butyl-3-methylimidazolium iodide (BMII), 50 mM I<sub>2</sub>, 50 mM LiI, 0.5 M tert-butylpyridine and 0.1 M guanidiniumthiocyanate (GuNCS) in acetonitrile.<sup>[S1]</sup>

### **Characterizations of DSSCs**

The photocurrent-voltage (*I-V*) curves of the DSSCs were measured on a Keithley 2400 source meter under standard global AM 1.5G solar irradiation supplied by a xenon light source (Oriel). The incident photo-to-electron conversion efficiency (IPCE) spectra of the DSSCs were measured by a DC method. The light source was a 300 W xenon lamp (Oriel 6258) coupled with a flux controller to improve the stability of the irradiance. The single wavelength was selected by a monochromator (Cornerstone 260 Oriel74125). Light intensity was measured by a NREL traceable Si detector (Oriel 71030NS) and the short circuit currents of the DSSCs were measured by an optical power meter (Oriel 70310).

### **Theoretical calculations**

Density function theory (DFT) calculations were performed at the DFT-B3LYP/LanL2DZ level with Gaussian 09 suite of programs.

### **UV-Vis spectroscopy, photoluminescence, electrochemical properties and measurement of dye adsorbed amounts**

The UV-Vis absorption spectra were recorded on a Shimadzu UV-3600 spectrometer. Fluorescence spectra were recorded on a Perkin Elmer LS55 spectrophotometer. FTIR spectra were recorded on a Vector22 spectrometer. The fluorescence lifetimes of the dyes were measured on a FLS920 spectrometer. The cyclic voltammograms of the dyes were recorded by IM6EX Electrochemical Workstation. Electrochemical Impedance Spectroscopy was studied using a Chenhua CHI660D model Electrochemical Workstation (Shanghai).

The amounts of dye adsorption on the TiO<sub>2</sub> films were measured by a Shimadzu

UV-3600 spectrometer. The sensitized electrodes were immersed into a 0.1 M NaOH solution in a mixed solvent ( $\text{H}_2\text{O}/\text{THF}=1/1$ ), which resulted in desorption of each dye.

### **Water-stability studies of the anchoring group under various aqueous conditions**

The water-stability of  $\text{TiO}_2$  films sensitized with JA4 and JA5 were investigated under various aqueous conditions for varying amounts of time, including acidic, neutral and alkaline conditions.<sup>[S2]</sup> All of the  $\text{TiO}_2$  film was prepared from the same batch. Considering the solubility of the dyes, we added THF into the deionized water ( $\text{H}_2\text{O}/\text{THF}=3/2$ , V/V). We used deionized water as the neutral condition, the acidic condition was adjusted with AcOH (10 mM), and the alkaline condition was adjusted with  $\text{K}_2\text{CO}_3$  (pH=11). Once removed from the water solution, the slides were rinsed with additional deionized water and dried under a stream of  $\text{N}_2$  gas for 5 min before measuring the amounts of dye adsorption.

## Synthesis of the dyes

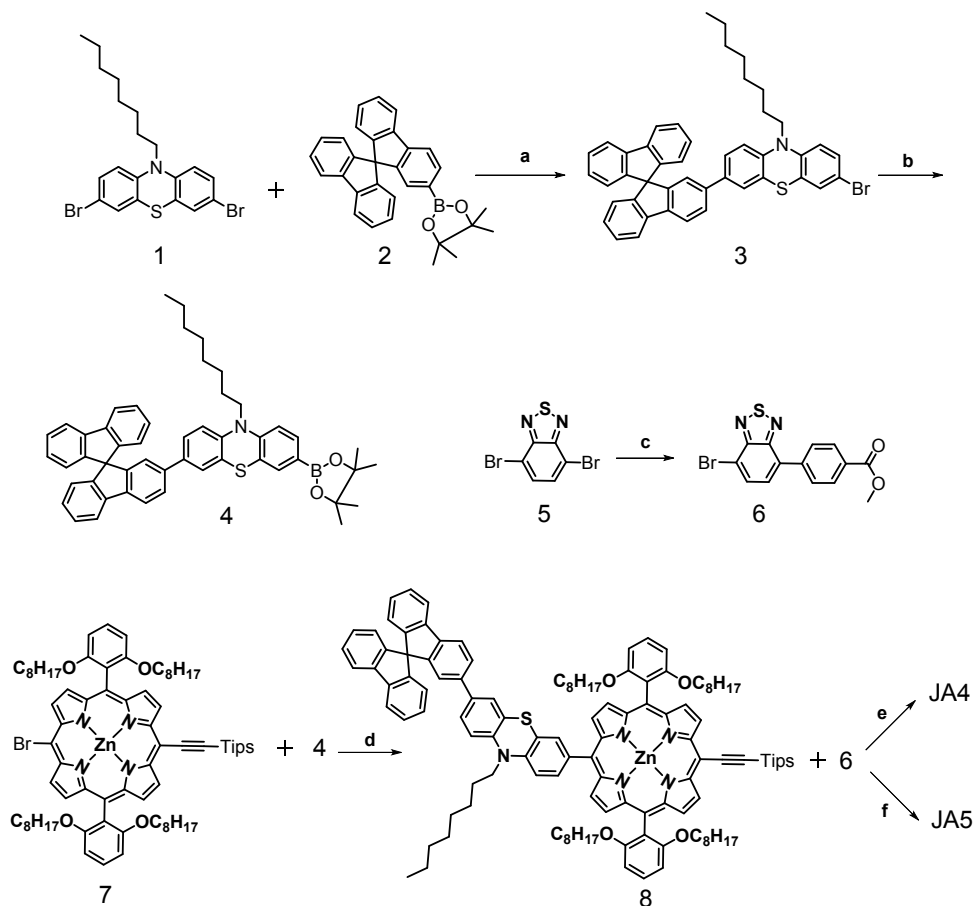

**Scheme S1** synthesis procedure of **JA4** and **JA5**. Reagents and conditions: a) Pd(PPh<sub>3</sub>)<sub>4</sub>, K<sub>2</sub>CO<sub>3</sub>, H<sub>2</sub>O, 1, 4-dioxane, 90°C; b) bis(pinacolato)diboron, Pd(dppf)Cl<sub>2</sub>, KOAc, DMF, 80°C; c) Methyl 4-boronobenzoate, Pd(PPh<sub>3</sub>)<sub>4</sub>, K<sub>2</sub>CO<sub>3</sub>, H<sub>2</sub>O, 1, 4-dioxane, 90°C; d) Pd(PPh<sub>3</sub>)<sub>4</sub>, K<sub>2</sub>CO<sub>3</sub>, H<sub>2</sub>O, 1, 4-dioxane, 90°C; e) i) Pd<sub>2</sub>(dba)<sub>3</sub>, AsPh<sub>3</sub>, Et<sub>3</sub>N, THF, reflux; ii) NaOH, EtOH, H<sub>2</sub>O, 90°C; f) i) Pd<sub>2</sub>(dba)<sub>3</sub>, AsPh<sub>3</sub>, Et<sub>3</sub>N, THF, reflux; ii) hydrazine hydrate, EtOH, 90°C.

### Synthesis of compound 3

Under an nitrogen, compound **5** (8 g, 17 mmol), compound **2** (7.5 g, 17 mmol),  $K_2CO_3$  (7.1 g, 51 mmol) and  $Pd(PPh_3)_4$  (0.98 g, 0.85 mmol) were dissolved in 1, 4-dioxane (100 mL) and  $H_2O$  (20 mL). The mixture was heated under  $90^\circ C$  for overnight. The reaction mixture was cooled to room temperature and extracted by EtOAc ( $3 \times 100$  mL). The combined organic layers were washed with brine, dried over  $MgSO_4$ , and evaporated in vacuo. The residue was purified by silica gel column chromatography (PE/EA=10/1) to give the compound **3** (4 g, 33%).  $^1H$  NMR ( $CDCl_3$ , 400 MHz)  $\delta_H$  7.83-7.86 (m, 4H), 7.52-7.54 (m, 1H), 7.38 (t,  $J = 7.6$ Hz, 3H), 7.14-7.19 (m, 4H), 7.07-7.12 (m, 3H), 6.85 (s, 1H), 6.70-6.78 (m, 4H), 6.62 (d,  $J = 8$ Hz, 1H), 3.72 (s, 2H), 1.67-1.74 (m, 2H), 1.23-1.37 (m, 10H), 0.84 (t,  $J = 7.2$ Hz, 3H). MS (ESI): Calcd for  $C_{45}H_{38}BrNS$ , 703.19; found, 703.75.

### Synthesis of compound 4

A mixture of compound **3** (2.5 g, 3.55 mmol), bis(pinacolato)diboron (1.35 g, 5.32 mmol) and KOAc (1.04 g, 10.64 mmol) in DMF (40 mL) was added  $Pd(dppf)Cl_2$  (0.29 g, 0.35 mmol) under dinitrogen. The mixture was heated under  $80^\circ C$  for overnight. The reaction mixture was cooled to room temperature and  $H_2O$  (150 mL) was added, the mixture was extracted by EtOAc ( $3 \times 50$  mL). The combined organic layers were washed with brine, dried over  $MgSO_4$ , and evaporated in vacuo. The residue was purified by silica gel column chromatography (PE/EA=10/1) to give the compound **4** (2 g, 75%).  $^1H$  NMR ( $CDCl_3$ , 300 MHz)  $\delta_H$  7.84-7.90 (m, 4H), 7.47-7.59 (m, 2H), 7.40 (t,  $J = 6.9$ Hz, 2H), 7.10-7.20 (m, 4H), 6.92-7.06 (m, 3H), 6.89 (s, 1H), 6.73-6.83 (m, 5H), 3.81 (t,  $J = 6.3$ Hz, 2H), 1.74-1.78 (m, 2H), 1.26-1.46 (m, 22H), 0.85-0.91 (m, 3H). MS (ESI): Calcd for  $C_{51}H_{50}BNO_2S$ , 751.36; found, 752.42.

### Synthesis of compound 6

Under an nitrogen, compound **5** (5 g, 17 mmol), Methyl 4-boronobenzoate (3.1 g, 17 mmol),  $K_2CO_3$  (7.1 g, 51 mmol) and  $Pd(PPh_3)_4$  (0.98 g, 0.85 mmol) were dissolved in 1, 4-dioxane (100 mL) and  $H_2O$  (20 mL). The mixture was heated under  $90^\circ C$  for overnight. The reaction mixture was cooled to room temperature and extracted by EtOAc (3×50 mL). The combined organic layers were washed with brine, dried over  $MgSO_4$ , and evaporated in vacuo. The residue was purified by silica gel column chromatography (PE/EA=4/1) to give the compound **6** (2 g, 34%).  $^1H$  NMR ( $CDCl_3$ , 400 MHz)  $\delta_H$  8.19 (d,  $J = 8.4Hz$ , 2H), 7.94-7.99 (m, 3H), 7.64 (d,  $J = 7.6 Hz$ , 1H), 3.97 (s, 3H).

### Synthesis of compound 8

Under an nitrogen, compound **4** (1 g, 1.33 mmol), compound **7** (1.21 g, 0.93 mmol)<sup>[S3]</sup>,  $K_2CO_3$  (0.55 g, 3.99 mmol) and  $Pd(PPh_3)_4$  (0.15 g, 0.13 mmol) were dissolved in 1, 4-dioxane (50 mL) and  $H_2O$  (10 mL). The mixture was heated under  $90^\circ C$  for overnight. The reaction mixture was cooled to room temperature and extracted by  $CH_2Cl_2$  (3×20 mL). The combined organic layers were washed with brine, dried over  $MgSO_4$ , and evaporated in vacuo. The residue was purified by silica gel column chromatography (PE/ $CH_2Cl_2 = 4/1$ ) to give the compound **8** as a green solid (1.9 g, 78%).  $^1H$  NMR ( $CDCl_3$ , 400 MHz)  $\delta_H$  9.63 (d,  $J = 4.8Hz$ , 2H), 8.84 (d,  $J = 4.8Hz$ , 2H), 8.74 (d,  $J = 4.8Hz$ , 2H), 8.70 (d,  $J = 4.8Hz$ , 2H), 7.74-7.80 (m, 6H), 7.61 (t,  $J = 8.4Hz$ , 2H), 7.50 (d,  $J = 6.8Hz$ , 1H), 7.19-7.28 (m, 5H), 7.12 (s, 1H), 7.01 (t,  $J = 7.2Hz$ , 4H), 6.83-6.89 (m, 5H), 6.70 (d,  $J = 7.2Hz$ , 2H), 6.62 (d,  $J = 7.6Hz$ , 1H), 3.94 (s, 2H), 3.72 (s, 8H), 1.90 (s, 2H), 1.44-1.49 (m, 2H), 1.12-1.38 (m, 29H), 0.78-0.86 (m, 11H), 0.63-0.69 (m, 8H), 0.29-0.51 (m, 44H). MS (ESI): Calcd for  $C_{120}H_{141}N_5O_4SSiZn$ , 1840.97; found, 1841.75.

### Synthesis of JA4

To a solution of compound **8** (500 mg, 0.27 mmol) in anhydrous THF (20 mL)

was added TBAF (0.6 mL, 1 M in THF). The solution was stirred at room temperature for 30 min under dinitrogen. The mixture was quenched with H<sub>2</sub>O and then extracted with CH<sub>2</sub>Cl<sub>2</sub>. The organic layer was dried over anhydrous MgSO<sub>4</sub> and the solvent was removed under reduced pressure. The residue and compound **6** (284 mg, 0.81 mmol) were dissolved in a mixture of anhydrous THF (50 mL) and Et<sub>3</sub>N (12 mL) under dinitrogen, then Pd<sub>2</sub>(dba)<sub>3</sub> (75 mg, 0.081 mmol) and AsPh<sub>3</sub> (166 mg, 0.542 mmol) were added to the mixture. The solution was refluxed for 6 h. The solvent was removed under reduced pressure and was purified by silica gel column chromatography (PE/DCM=4/1), then the residue was added in EtOH (10 mL), THF (20 mL) and H<sub>2</sub>O (30 mL), and then added NaOH (0.29 g, 7.31 mmol). The mixture was heated under 90 °C for overnight. The reaction mixture was cooled to room temperature and the solvent was evaporated, the residue was acidified with diluted HCl, then filtered and recrystallization from MeOH/Ether to give dye **JA4** as a brown solid (200 mg, 38%). <sup>1</sup>H NMR (THF-*d*<sub>8</sub>, 300 MHz) δ<sub>H</sub> 10.07 (d, *J* = 4.5 Hz, 2H), 8.83-8.91 (m, 2H), 8.73-8.80 (m, 2H), 8.62-8.67 (m, 2H), 8.52 (d, *J* = 4.5 Hz, 1H), 8.37-8.39 (m, 1H), 8.28-8.33 (m, 2H), 8.21 (d, *J* = 8.1 Hz, 2H), 8.11-8.16 (m, 2H), 8.03 (d, *J* = 8.1 Hz, 1H), 7.87-7.96 (m, 4H), 7.79-7.84 (m, 3H), 7.63-7.73 (m, 3H), 7.33-7.38 (m, 3H), 7.04-7.13 (m, 8H), 6.73-6.76 (m, 2H), 6.68 (d, *J* = 7.5 Hz, 1H), 4.54 (s, 2H), 3.88 (s, 8H), 2.13-2.20 (m, 2H), 1.47-1.51 (m, 2H), 1.30-1.40 (m, 8H), 0.85-0.92 (m, 26H), 0.51-0.72 (m, 37H). <sup>13</sup>C NMR (THF-*d*<sub>8</sub>, 75 MHz) δ<sub>C</sub> 161.27, 157.46, 154.51, 153.42, 152.39, 152.17, 151.58, 151.49, 150.93, 150.38, 149.91, 143.08, 142.57, 142.32, 140.44, 138.80, 138.70, 138.29, 136.91, 135.29, 133.06, 131.80, 130.83, 130.15, 129.82, 128.77, 128.08, 127.67, 127.46, 125.71, 125.03, 122.95, 122.16, 121.62, 121.07, 117.49, 115.92, 114.81, 106.76, 105.67, 104.64, 97.84, 92.84, 69.16, 48.70, 32.99, 32.62, 30.52, 29.89, 27.78, 26.45, 23.73, 23.40, 14.66, 14.46. MS (ESI): Calcd for C<sub>124</sub>H<sub>127</sub>N<sub>7</sub>O<sub>6</sub>S<sub>2</sub>Zn, 1938.86; found, 1938.33.

### Synthesis of **JA5**

To a solution of compound **8** (500 mg, 0.27 mmol) in anhydrous THF (20 mL)



was added TBAF (0.6 mL, 1 M in THF). The solution was stirred at room temperature for 30 min under dinitrogen. The mixture was quenched with H<sub>2</sub>O and then extracted with CH<sub>2</sub>Cl<sub>2</sub>. The organic layer was dried over anhydrous MgSO<sub>4</sub> and the solvent was removed under reduced pressure. The residue and compound **6** (284 mg, 0.81 mmol) were dissolved in a mixture of anhydrous THF (50 mL) and Et<sub>3</sub>N (12 mL) under dinitrogen, then Pd<sub>2</sub>(dba)<sub>3</sub> (75 mg, 0.081 mmol) and AsPh<sub>3</sub> (166 mg, 0.542 mmol) were added to the mixture. The solution was refluxed for 6 h. The solvent was removed under reduced pressure and was purified by silica gel column chromatography (PE/DCM= 4/1), then the residue was added in EtOH (30 mL) and hydrazine hydrate (30 mL). The mixture was heated under 80°C for overnight. The reaction mixture was cooled to room temperature and the solvent was evaporated, the residue was purified by silica gel column chromatography (DCM/MeOH=20/1), and then recrystallization from MeOH/Ether to give dye **JA5** as a brown solid (180 mg, 34%). <sup>1</sup>H NMR (THF-*d*<sub>8</sub>, 300Hz) δ<sub>H</sub> 10.05 (d, *J* = 4.5Hz, 2H), 8.86-8.90 (m, 2H), 8.73-8.80 (m, 2H), 8.62-8.67 (m, 2H), 8.51 (d, *J* = 4.8Hz, 1H), 8.36-8.38 (m, 2H), 8.28-8.30 (m, 3H), 8.12-8.14 (m, 3H), 8.03-8.07 (m, 1H), 7.88-7.96 (m, 4H), 7.80-7.85 (m, 3H), 7.63-7.73 (m, 3H), 7.33-7.38 (m, 3H), 7.04-7.12 (m, 8H), 6.73-6.75 (m, 2H), 6.67 (d, *J* = 7.5Hz, 1H), 4.54 (s, 2H), 3.89 (s, 8H), 2.31 (m, 2H), 2.07-2.16 (m, 2H), 1.46-1.50 (m, 2H), 1.29-1.39 (m, 8H), 1.12-1.17 (m, 2H), 0.83-0.98 (m, 24H), 0.50-0.72 (m, 37H). <sup>13</sup>C NMR (THF-*d*<sub>8</sub>, 75 MHz) δ<sub>C</sub> 161.26, 157.46, 154.53, 153.41, 152.38, 152.16, 151.58, 151.49, 150.93, 150.36, 149.91, 143.07, 142.56, 142.33, 140.40, 138.79, 138.68, 138.25, 136.91, 135.28, 133.02, 131.85, 130.71, 130.01, 129.77, 128.77, 127.94, 127.73, 127.44, 126.00, 125.60, 122.94, 122.17, 121.61, 121.07, 117.50, 115.92, 114.82, 106.78, 105.69, 104.59, 97.89, 92.85, 69.16, 48.70, 32.99, 32.62, 30.51, 29.91, 27.75, 26.44, 23.73, 23.40, 14.66, 14.48. MS (ESI): Calcd for C<sub>124</sub>H<sub>129</sub>N<sub>9</sub>O<sub>5</sub>S<sub>2</sub>Zn, 1952.88; found, 1952.17.

**Table S1.** Optical and electrochemical properties of dyes

| Dye | <sup>a</sup> $\lambda_{\text{max}}/\text{nm}$<br>( $\epsilon \times 10^5 \text{ M}^{-1} \text{ cm}^{-1}$ ) | <sup>b</sup> $\lambda_{\text{max}}/\text{nm}$ | <sup>c</sup> $E_{\text{OX}}/\text{V}$<br>(vs. NHE) | <sup>d</sup> $E_{0-0}/\text{eV}$ | <sup>e</sup> $E^*_{\text{OX}}/\text{V}$<br>(vs. NHE) |
|-----|------------------------------------------------------------------------------------------------------------|-----------------------------------------------|----------------------------------------------------|----------------------------------|------------------------------------------------------|
| JA4 | 435(1.52), 459(0.92)<br>576(0.12), 648(0.47)                                                               | 685                                           | 1.04                                               | 1.90                             | -0.86                                                |
| JA5 | 435(1.64), 458(1.12)<br>575(0.15), 647(0.60)                                                               | 683                                           | 1.02                                               | 1.91                             | -0.89                                                |

[a] Absorption maximum in THF solution ( $1 \times 10^{-6} \text{ M}$ ), [b] emission maximum in THF solution ( $1 \times 10^{-6} \text{ M}$ ), [c] the ground state oxidation potentials, [d]  $E_{0-0}$  was estimated from the intercept of the normalized absorption and emission spectra, [e]  $E^*_{\text{OX}}$  was calculated by the formula:  $E^*_{\text{OX}} = E_{\text{OX}} - E_{0-0}$ .

**Table S2.** Photovoltaic parameters of the DSSCs obtained from the J-V curves

| Dye | $J_{\text{sc}}$ ( $\text{mA cm}^{-2}$ ) | $V_{\text{oc}}$ (V) | FF (%) | $\eta$ (%) | Amounts of dye adsorption<br>( $10^{-7} \text{ mol cm}^{-2}$ ) |
|-----|-----------------------------------------|---------------------|--------|------------|----------------------------------------------------------------|
| JA4 | 14.44                                   | 0.772               | 62.77  | 7.00       | 1.56                                                           |
| JA5 | 11.57                                   | 0.737               | 64.38  | 5.49       | 1.35                                                           |

The size of the active area for each cell is  $0.196 \text{ cm}^2$ , the DSSCs were all measured under standard global AM 1.5G solar irradiation.

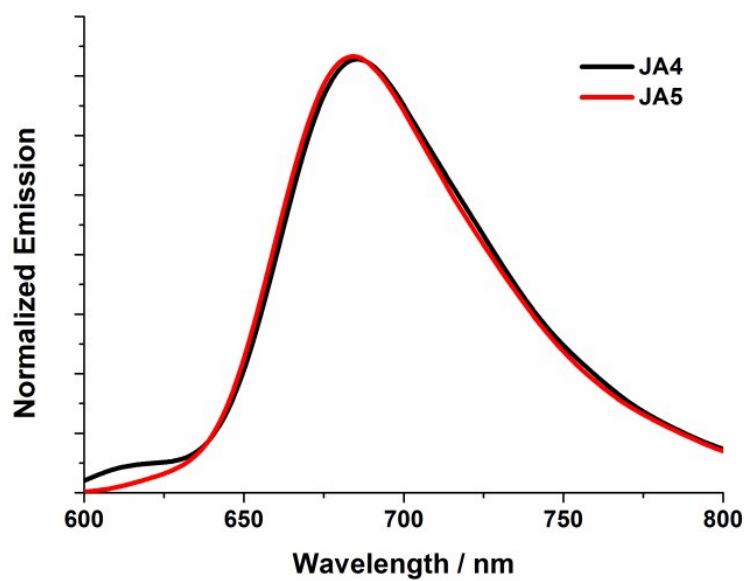

Fig. S1 Emission spectra of JA4 and JA5 in THF.

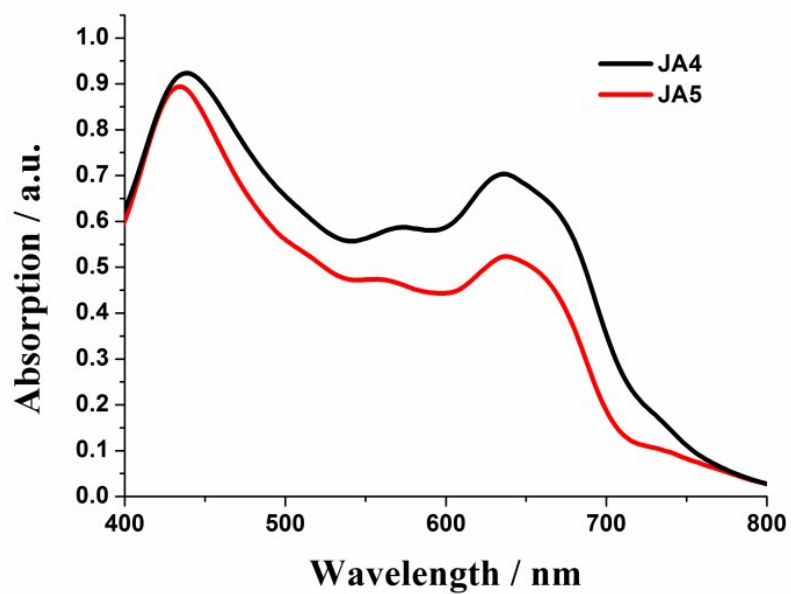

**Fig. S2** Absorption spectra of **JA4** and **JA5** anchored on the 12  $\mu\text{m}$  porous  $\text{TiO}_2$  nanoparticle films.

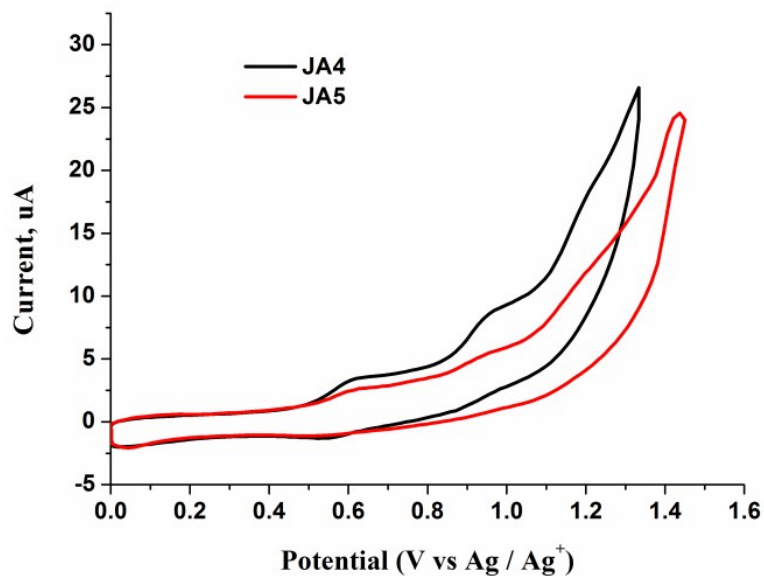

**Fig. S3** Cyclic voltammogram of **JA4** and **JA5** in DMF, 0.1 M  $\text{TBAPF}_6$ , glassy carbon electrode as working electrode, Pt as counter electrode,  $\text{Ag}/\text{Ag}^+$  as reference electrode, scan rate:  $100 \text{ mV s}^{-1}$ , calibrated with ferrocene/ferrocenium ( $\text{Fc}/\text{Fc}^+$ ) as an external reference.

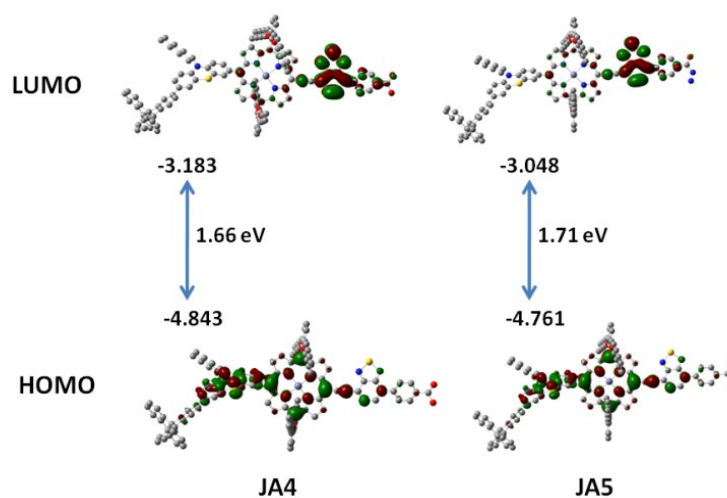

**Fig. S4** The HOMO and LUMO frontier molecular orbitals of JA4 and JA5 calculated at the DFT-B3LYP/LanL2DZ level with the Gaussian 09 suite of programs.

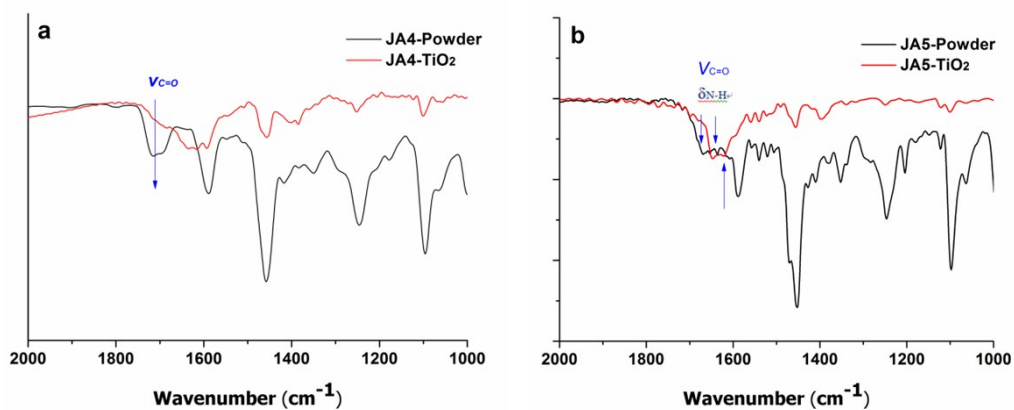

**Fig. S5** FTIR spectra of dye powders (black line) and dyes adsorbed on TiO<sub>2</sub> films (red line) for dye JA4 (a) and JA5 (b).

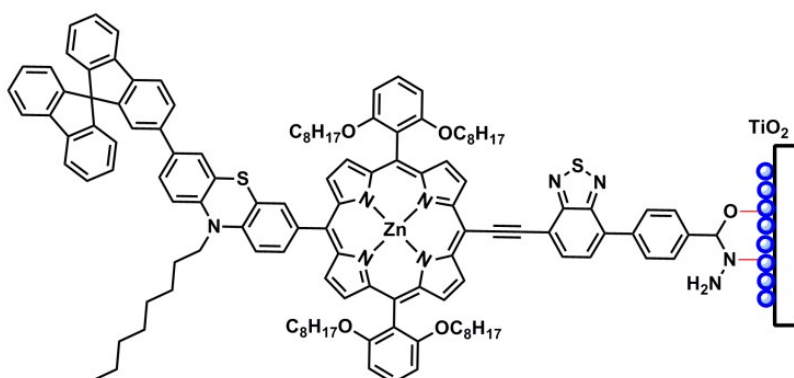

**Fig. S6** Configuration of JA5 adsorbed on TiO<sub>2</sub> surface.

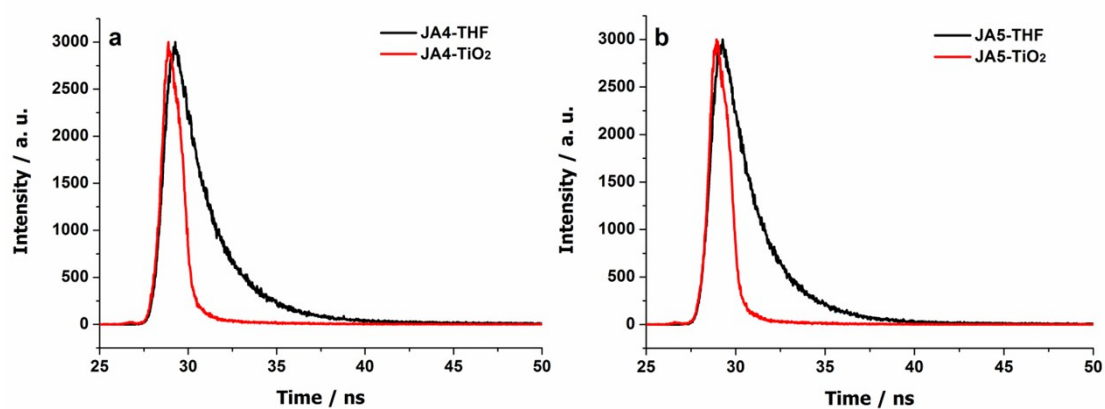

**Fig. S7** Fluorescence decay curves of dyes in THF (black line) and dyes adsorbed onto TiO<sub>2</sub> surface (red line), (a) JA4, (b) JA5.

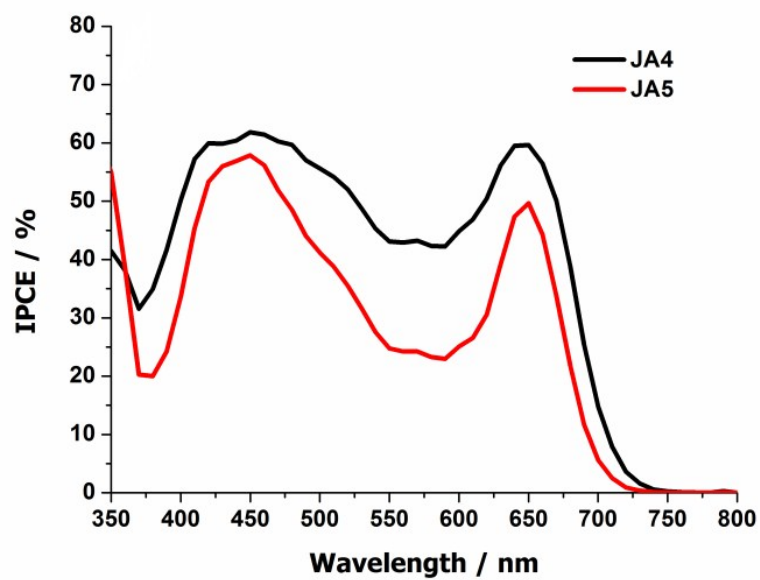

**Fig. S8** The IPCE curves of DSSCs based on JA4 and JA5.

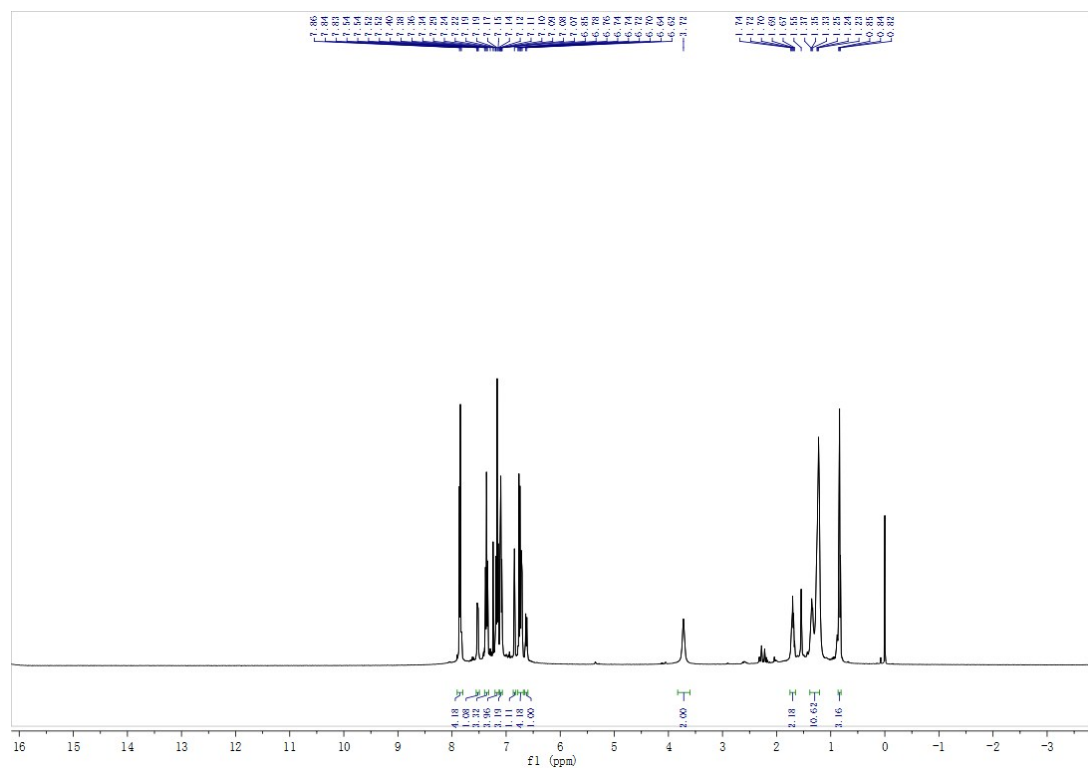

**Fig. S9**  $^1\text{H}$  NMR of compound 3 ( $\text{CDCl}_3$ )

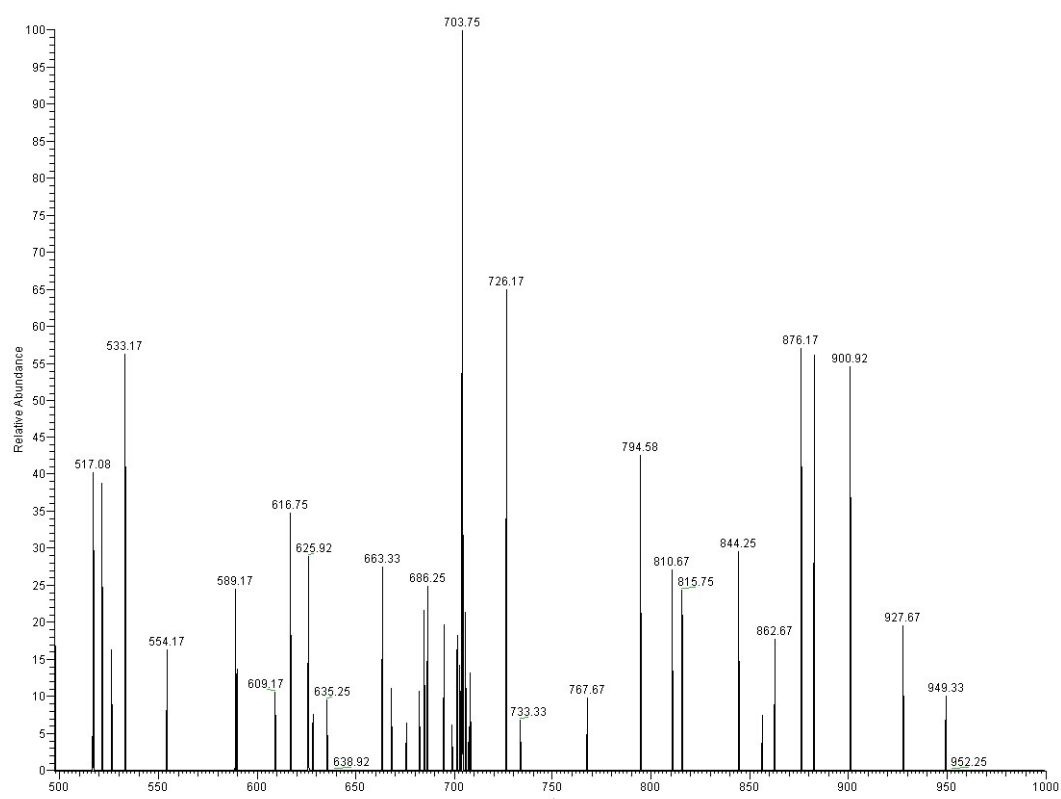

**Fig. S10** ESI-MS of compound 3, found 703.75.

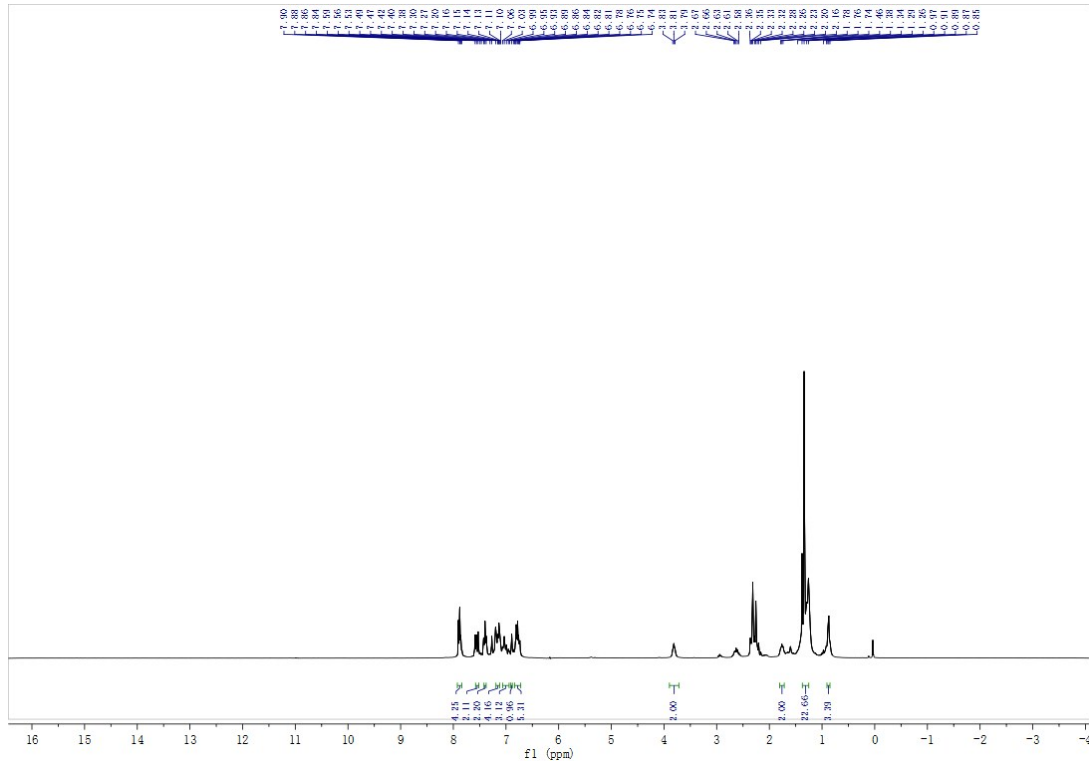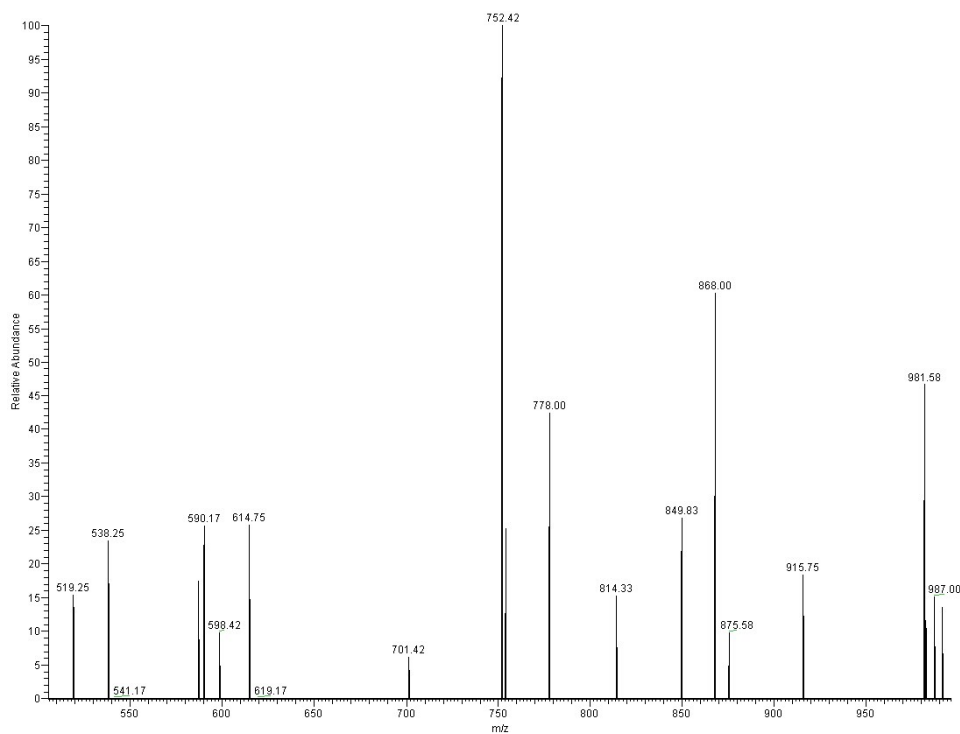



Fig. S12 ESI-MS of compound 4, found 752.42.

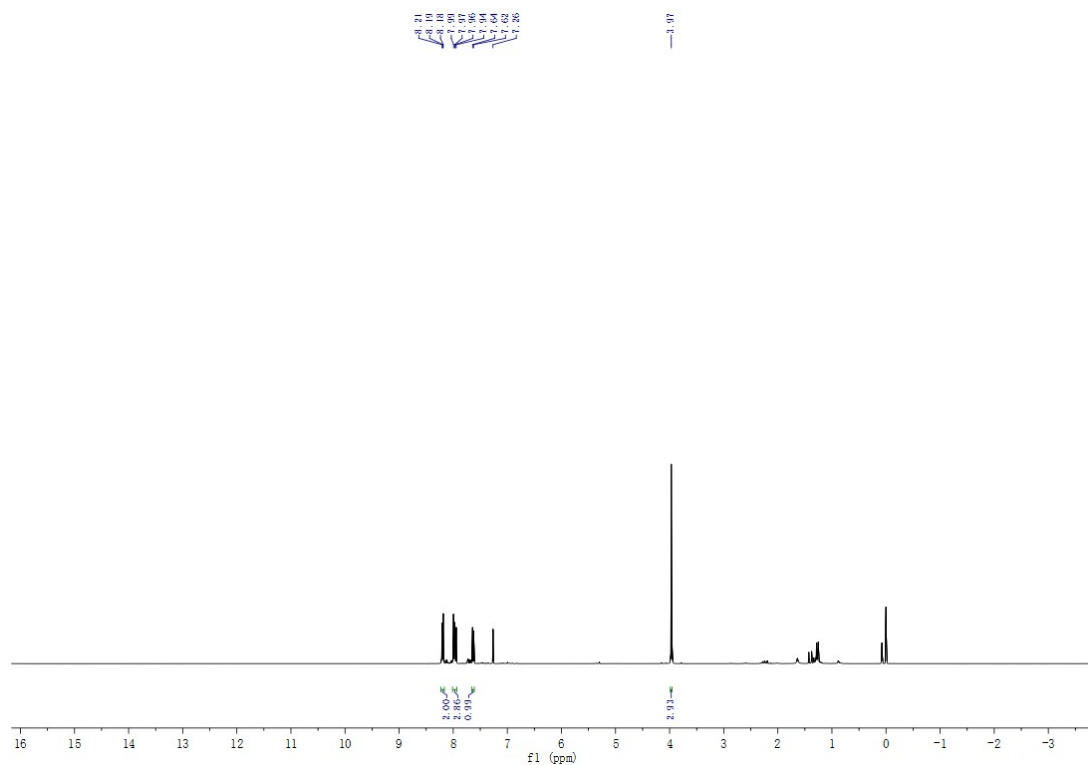

Fig. S13  $^1\text{H}$  NMR of compound 6 ( $\text{CDCl}_3$ )

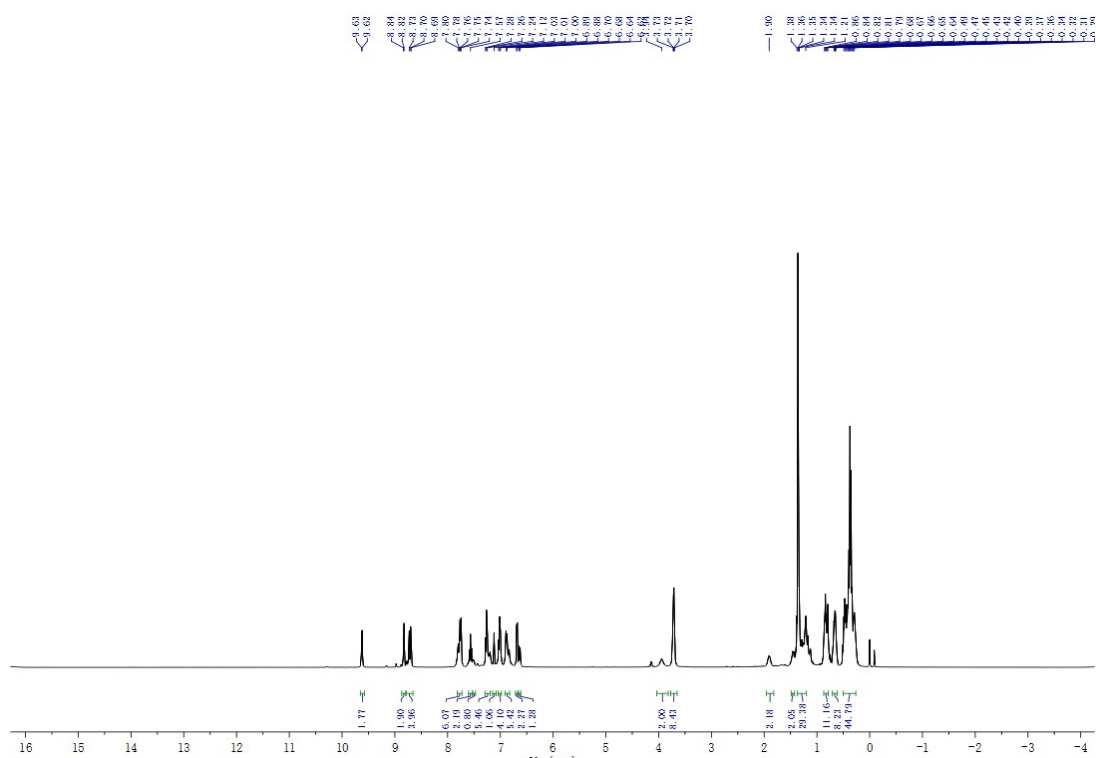

**Fig. S14**  $^1\text{H}$  NMR of compound 8 ( $\text{CDCl}_3$ )

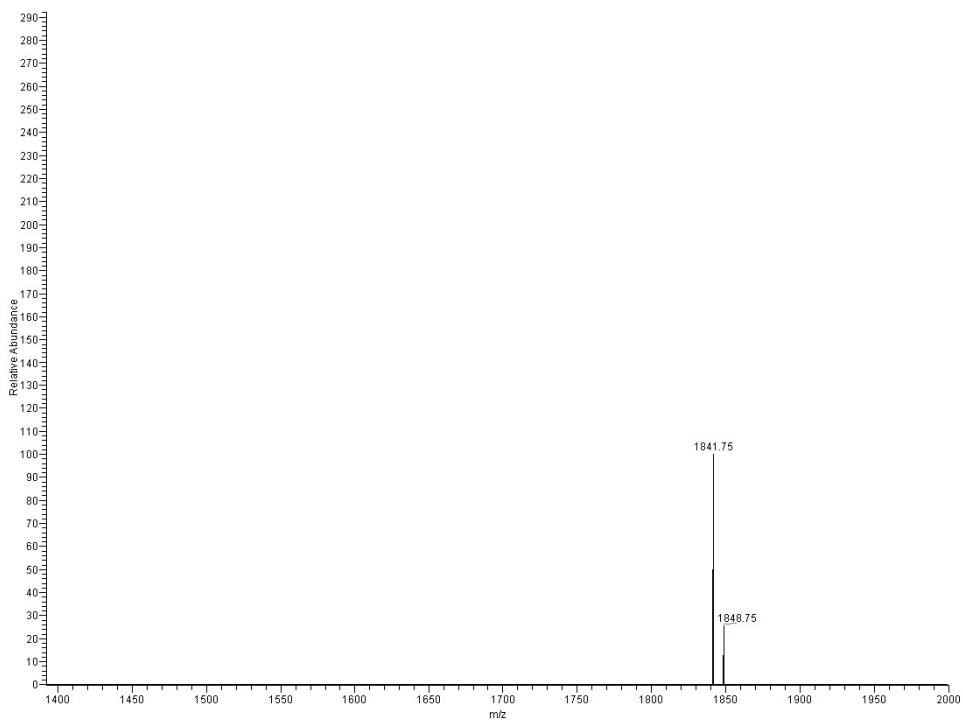

**Fig. S15** ESI-MS of compound 8, found 1841.75.

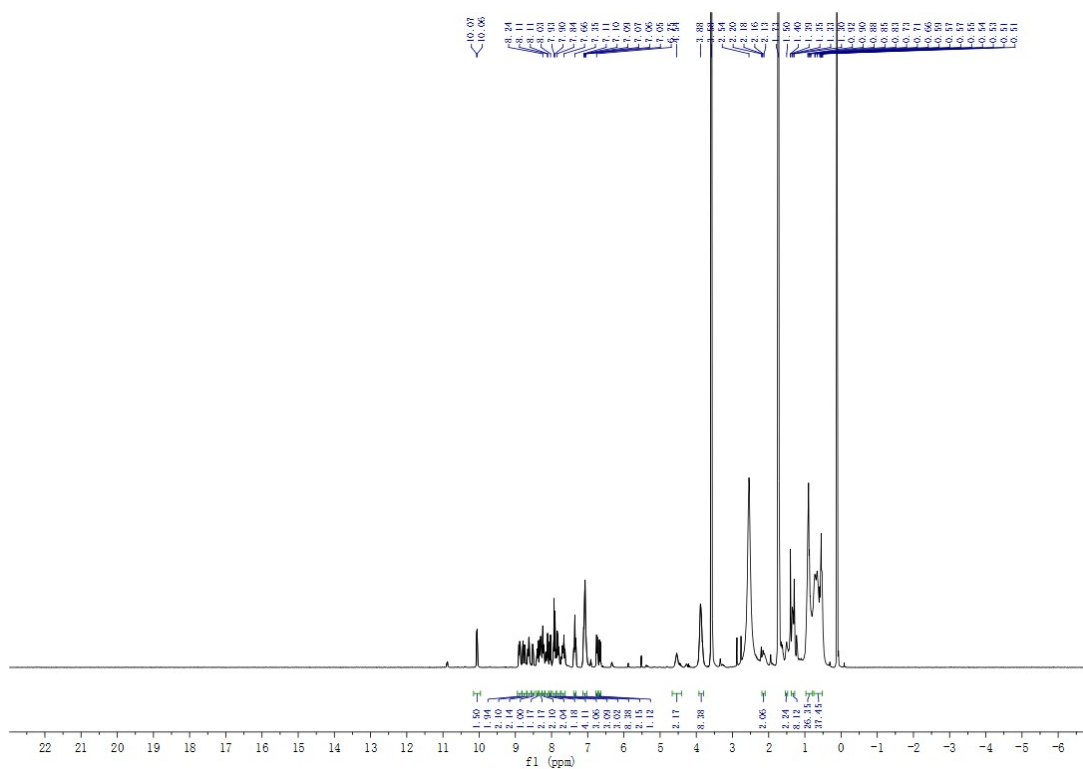

**Fig. S16**  $^1\text{H}$  NMR of JA4 (THF- $d_8$ )

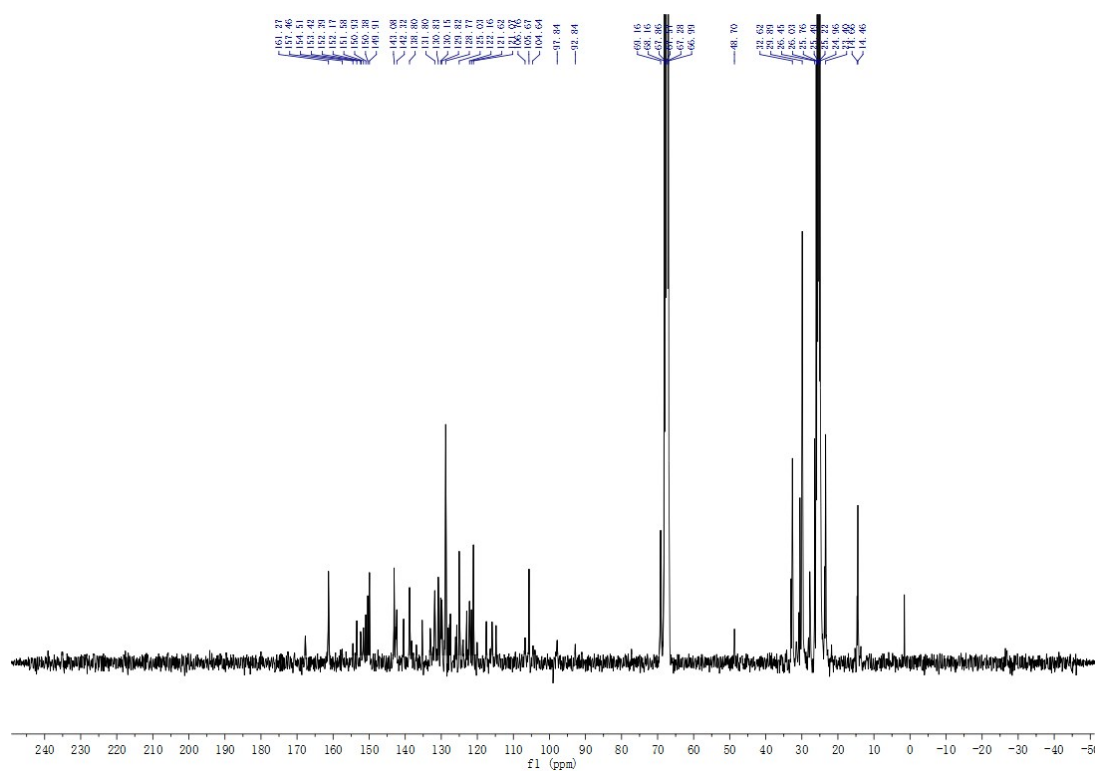

**Fig. S17**  $^{13}\text{C}$  NMR of JA4 (THF- $d_8$ )

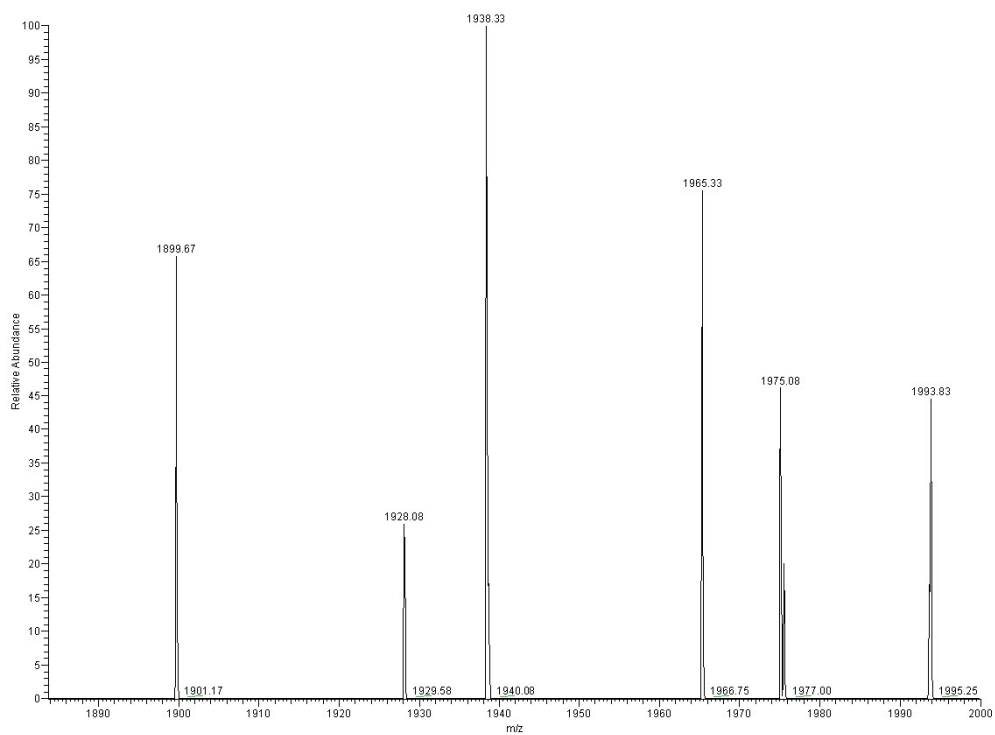

**Fig. S18** ESI-MS of JA4, found 1938.33.

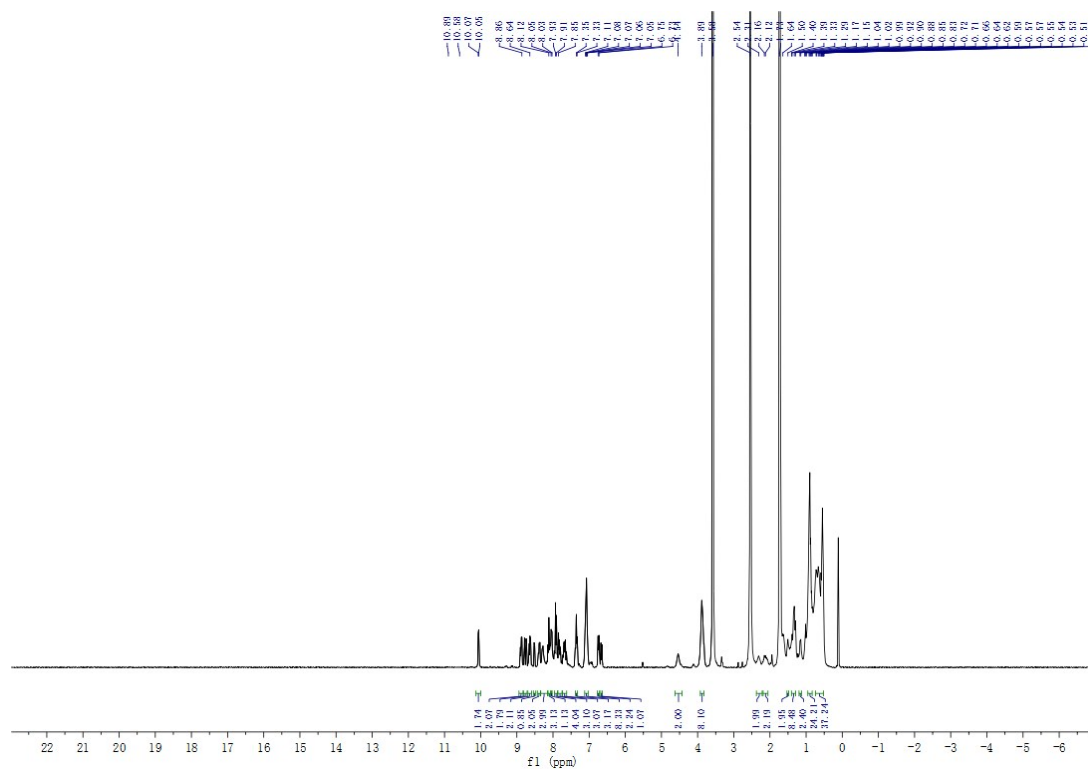

**Fig. S19** <sup>1</sup>H NMR of JA5 (THF-*d*<sub>8</sub>)

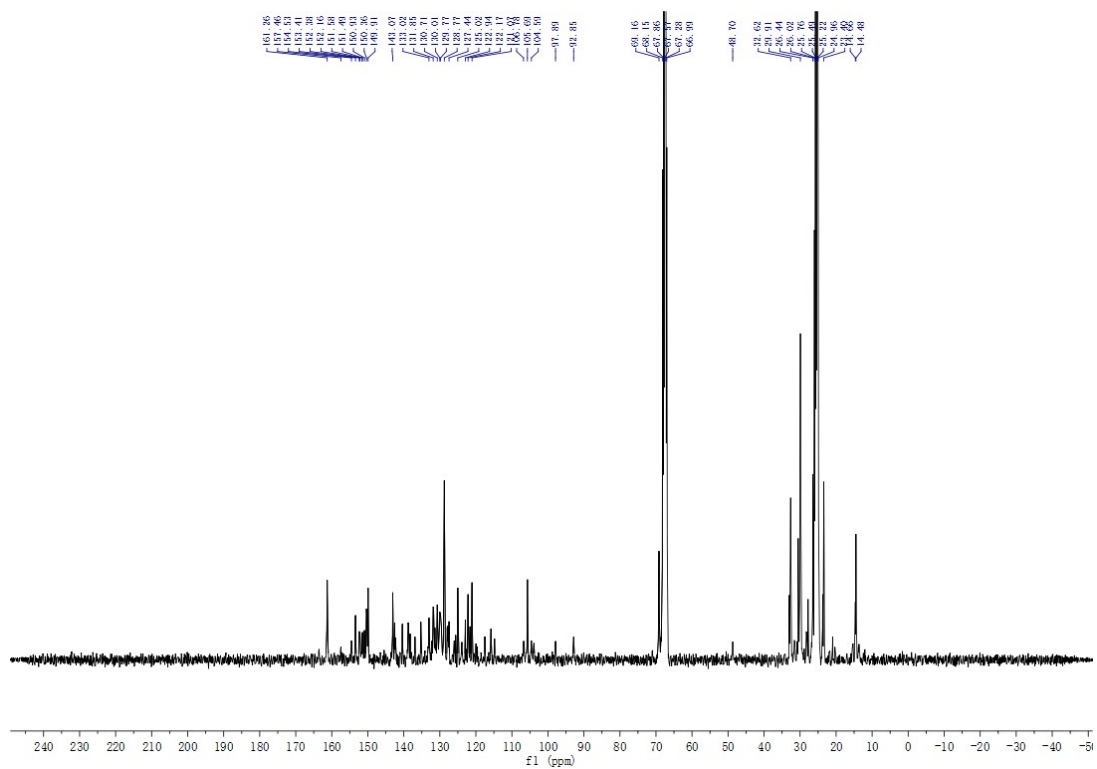

**Fig. S20**  $^{13}\text{C}$  NMR of JA5 (THF- $d_8$ )

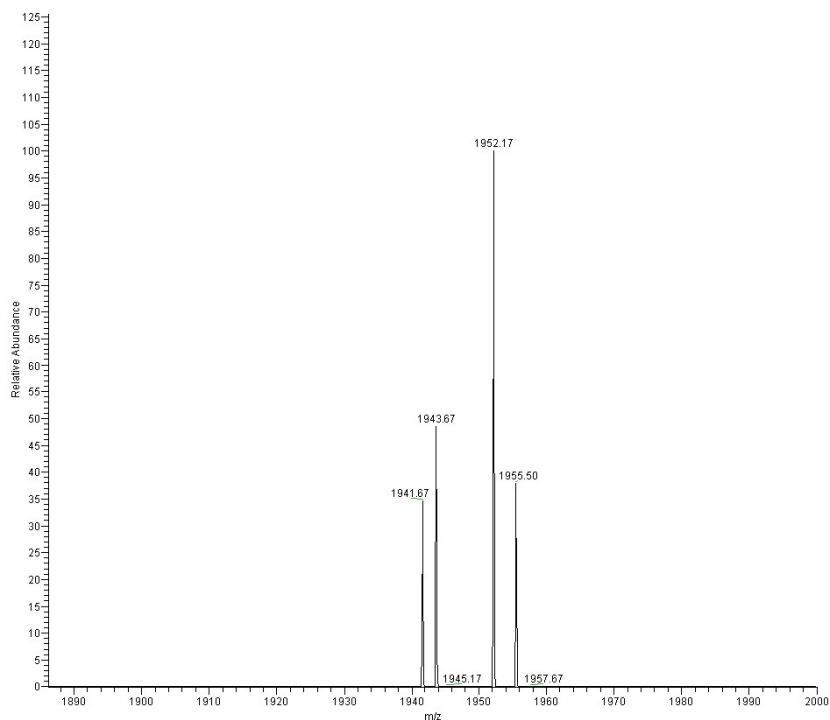

**Fig. S21** ESI-MS of JA5, found 1952.17.

## References

- [S1] S. Ito, T. N. Murakami, P. Comte, P. Liska, C. Grätzel, M. K. Nazeeruddin, M. Grätzel, *Thin Solid Films*, 2008, **516**, 4613.
- [S2] (a) W. R. McNamara, R. L. Milot, H.-e. Song, R. C. Snoeberger, V. S. Batista, C. A. Schmuttenmaer, G. W. Brudvig, R. H. Crabtree, *Energy Environ. Sci.* 2010, **3**, 917. (b) T. Higashino, Y. Fujimori, K. Sugiura, Y. Tsuji, S. Ito, H. Imahori, *Angew. Chem.*, 2015, **127**, 9180.
- [S3] A. Yella, H. W. Lee, H. N. Tsao, C. Yi, A. K. Chandiran, M. K. Nazeeruddin, E. W. G. Diau, C. Y. Yeh, S. M. Zakeeruddin, M. Grätzel, *Science*, 2011, **334**, 629.
